# Supplementary material
Source: Research Square preprint supplement (doi:10.21203/rs.3.rs-9401113/v1)
Supplement: Supplementary file 1 [file 37691bef19e899ecbd3075e8.xlsx]

## Sheet: Sheet1
Time	Maximum current density in the armature(A/m^2)	Average current density in the armature(A/m^2)	Variation in the Lorentz force(N)	Average armature temperature(K)	Average stress at the contact surface(Pa)	Contact resistance(N)	Joule heating at the contact surface(W)	Armature Joule heat(W)	Average temperature at the saddle(K)	Average temperature at the contact surface(K)	Maximum current density at the contact surface(A/m^2)	Average current density at the contact surface(A/m^2)
0	1.5089E5	2132.3	3.2007E-11	293.15	5.6555E6	2341.4	8.0661E-5	1.9217E-4	293.15	293.15	1.3024E5	8284
5.0000E-6	1.0996E8	2.4926E6	0.014485	293.15	5.6555E6	2341.4	18.704	192.17	293.15	293.15	8.1685E7	8.5813E6
1.0000E-5	2.1885E8	5.8111E6	0.10927	293.15	5.6555E6	2341.4	73.86	768.44	293.15	293.16	1.5629E8	1.7452E7
1.5000E-5	3.2760E8	9.7373E6	0.35401	293.15	5.6557E6	2341.5	184.48	1727.6	293.15	293.18	2.2928E8	2.6472E7
2.0000E-5	4.3555E8	1.4171E7	0.8148	293.15	5.6561E6	2341.6	366.41	3066.5	293.15	293.2	3.0096E8	3.5590E7
2.5000E-5	5.4232E8	1.8924E7	1.5503	293.15	5.6567E6	2341.9	624.31	4781	293.16	293.22	3.7148E8	4.4720E7
3.0000E-5	6.4635E8	2.4486E7	2.6277	293.15	5.6576E6	2342.3	1001.8	6855.8	293.16	293.26	4.3912E8	5.3959E7
3.5000E-5	7.4902E8	2.9744E7	4.0585	293.15	5.6589E6	2342.8	1422.6	9295.7	293.17	293.3	5.0636E8	6.2947E7
4.0000E-5	8.4767E8	3.5599E7	5.9284	293.15	5.6606E6	2343.5	1959.5	12071	293.18	293.35	5.6992E8	7.1883E7
4.5000E-5	9.4253E8	4.1675E7	8.2571	293.15	5.6627E6	2344.4	2581.1	15174	293.19	293.41	6.3052E8	8.0624E7
5.0000E-5	1.0324E9	4.8025E7	11.079	293.16	5.6654E6	2345.4	3287.7	18582	293.2	293.49	6.8724E8	8.9124E7
5.5000E-5	1.1172E9	5.4502E7	14.411	293.16	5.6686E6	2346.8	4053.5	22279	293.22	293.57	7.4156E8	9.7297E7
6.0000E-5	1.1951E9	6.1514E7	18.304	293.16	5.6723E6	2348.3	4939.9	26231	293.24	293.66	7.9405E8	1.0528E8
6.5000E-5	1.2685E9	6.8033E7	22.683	293.16	5.6767E6	2350.1	5750	30454	293.27	293.77	8.4310E8	1.1260E8
7.0000E-5	1.3344E9	7.5009E7	27.65	293.16	5.6818E6	2352.2	6650	34898	293.29	293.88	8.8742E8	1.1966E8
7.5000E-5	1.3935E9	8.2075E7	33.172	293.17	5.6875E6	2354.6	7561.4	39559	293.33	294	9.2732E8	1.2629E8
8.0000E-5	1.4456E9	8.9265E7	39.251	293.17	5.6940E6	2357.3	8480.5	44422	293.36	294.14	9.6265E8	1.3250E8
8.5000E-5	1.4909E9	9.6496E7	45.87	293.17	5.7013E6	2360.3	9380	49481	293.4	294.29	9.9357E8	1.3826E8
9.0000E-5	1.5297E9	1.0369E8	53.008	293.18	5.7093E6	2363.6	10237	54733	293.45	294.44	1.0204E9	1.4353E8
9.5000E-5	1.5610E9	1.1133E8	60.743	293.18	5.7182E6	2367.3	11163	60154	293.5	294.61	1.0426E9	1.4864E8
1.0000E-4	1.5872E9	1.1865E8	68.913	293.19	5.7280E6	2371.3	11977	65773	293.56	294.79	1.0616E9	1.5313E8
1.0500E-4	1.6076E9	1.2613E8	77.607	293.19	5.7386E6	2375.7	12799	71579	293.62	294.97	1.0772E9	1.5737E8
1.1000E-4	1.6226E9	1.3363E8	86.775	293.2	5.7502E6	2380.5	13602	77573	293.69	295.16	1.0895E9	1.6125E8
1.1500E-4	1.6331E9	1.4117E8	96.416	293.2	5.7626E6	2385.7	14405	83764	293.77	295.36	1.0994E9	1.6486E8
1.2000E-4	1.6389E9	1.4883E8	106.51	293.21	5.7761E6	2391.2	15224	90148	293.85	295.57	1.1066E9	1.6823E8
1.2500E-4	1.6417E9	1.5641E8	117.04	293.22	5.7905E6	2397.2	16061	96752	293.94	295.78	1.1124E9	1.7134E8
1.3000E-4	1.6414E9	1.6409E8	127.99	293.22	5.8059E6	2403.6	16947	1.0357E5	294.03	296	1.1166E9	1.7429E8
1.3500E-4	1.6383E9	1.7177E8	139.36	293.23	5.8224E6	2410.4	17897	1.1061E5	294.14	296.23	1.1200E9	1.7707E8
1.4000E-4	1.6331E9	1.7950E8	151.13	293.24	5.8398E6	2417.6	18932	1.1787E5	294.25	296.46	1.1259E9	1.7972E8
1.4500E-4	1.6278E9	1.8714E8	163.41	293.25	5.8583E6	2425.3	20092	1.2540E5	294.37	296.7	1.1320E9	1.8234E8
1.5000E-4	1.6191E9	1.9511E8	175.88	293.26	5.8780E6	2433.4	21344	1.3313E5	294.49	296.94	1.1358E9	1.8484E8
1.5500E-4	1.6075E9	2.0296E8	188.69	293.27	5.8987E6	2442	22746	1.4106E5	294.63	297.2	1.1381E9	1.8710E8
1.6000E-4	1.5987E9	2.1088E8	201.98	293.28	5.9206E6	2451	24327	1.4931E5	294.77	297.46	1.1419E9	1.8955E8
1.6500E-4	1.5909E9	2.1889E8	215.69	293.29	5.9436E6	2460.5	26092	1.5783E5	294.92	297.73	1.1699E9	1.9210E8
1.7000E-4	1.5773E9	2.2685E8	229.57	293.31	5.9677E6	2470.5	28054	1.6652E5	295.08	298.01	1.2209E9	1.9432E8
1.7500E-4	1.5636E9	2.3484E8	243.72	293.32	5.9930E6	2480.9	30242	1.7546E5	295.25	298.3	1.2721E9	1.9652E8
1.8000E-4	1.5593E9	2.4304E8	258.59	293.33	6.0195E6	2491.9	32639	1.8482E5	295.43	298.6	1.3208E9	1.9935E8
1.8500E-4	1.5522E9	2.5130E8	273.8	293.35	6.0474E6	2503.5	35265	1.9440E5	295.62	298.91	1.3697E9	2.0211E8
1.9000E-4	1.5753E9	2.5930E8	288.49	293.37	6.0762E6	2515.4	38244	2.0393E5	295.82	299.24	1.4233E9	2.0377E8
1.9500E-4	1.6155E9	2.6744E8	303.7	293.38	6.1061E6	2527.7	41504	2.1391E5	296.03	299.58	1.4747E9	2.0607E8
2.0000E-4	1.6562E9	2.7640E8	321.58	293.4	6.1382E6	2541	44630	2.2493E5	296.25	299.94	1.5136E9	2.1123E8
2.0500E-4	1.6962E9	2.8463E8	337.24	293.42	6.1713E6	2554.7	48421	2.3517E5	296.48	300.34	1.5671E9	2.1292E8
2.1000E-4	1.7362E9	2.9286E8	353.08	293.44	6.2051E6	2568.7	52550	2.4580E5	296.73	300.76	1.6197E9	2.1500E8
2.1500E-4	1.7781E9	3.0310E8	376.43	293.46	6.2426E6	2584.3	55417	2.5934E5	296.98	301.19	1.6397E9	2.2480E8
2.2000E-4	1.8176E9	3.1168E8	393.67	293.49	6.2805E6	2600	59499	2.6989E5	297.25	302.48	1.6931E9	2.2585E8
2.2500E-4	1.8895E9	3.1887E8	405.99	293.52	6.3171E6	2615.1	65354	2.7997E5	297.52	303.37	1.7630E9	2.2422E8
2.3000E-4	1.9552E9	3.2761E8	423.77	293.55	6.3556E6	2631	70233	2.9198E5	297.82	303.81	1.8101E9	2.2770E8
2.3500E-4	2.0238E9	3.3639E8	441.88	293.57	6.3966E6	2647.9	75100	3.0419E5	298.13	304.26	1.8587E9	2.3109E8
2.4000E-4	2.0930E9	3.4520E8	460.25	293.6	6.4393E6	2665.6	79973	3.1667E5	298.45	304.75	1.9071E9	2.3452E8
2.4500E-4	2.1624E9	3.5452E8	479.64	293.63	6.4834E6	2683.8	85485	3.2943E5	298.78	305.27	1.9604E9	2.3879E8
2.5000E-4	2.2316E9	3.6419E8	499.97	293.66	6.5289E6	2702.7	91392	3.4247E5	299.12	305.83	2.0137E9	2.4373E8
2.5500E-4	2.3028E9	3.7207E8	517.56	293.69	6.5760E6	2722.1	94596	3.5575E5	299.48	306.4	2.0659E9	2.4560E8
2.6000E-4	2.3736E9	3.8145E8	537.85	293.72	6.6246E6	2742.2	99866	3.6932E5	299.86	307.01	2.1186E9	2.5002E8
2.6500E-4	2.4447E9	3.9024E8	557.42	293.76	6.6745E6	2762.9	1.0404E5	3.8319E5	300.24	307.64	2.1697E9	2.5348E8
2.7000E-4	2.5162E9	3.9955E8	578.15	293.79	6.7262E6	2784.3	1.0893E5	3.9731E5	300.64	308.3	2.2218E9	2.5786E8
2.7500E-4	2.5907E9	4.0875E8	598.75	293.83	6.7794E6	2806.3	1.1373E5	4.1166E5	301.05	308.98	2.2727E9	2.6187E8
2.8000E-4	2.6589E9	4.1795E8	619.4	293.87	6.8339E6	2828.9	1.1851E5	4.2625E5	301.47	309.71	2.3317E9	2.6616E8
2.8500E-4	2.7522E9	4.2728E8	640.5	293.91	6.8900E6	2852.1	1.2361E5	4.4109E5	301.91	310.47	2.3640E9	2.7007E8
2.9000E-4	2.8219E9	4.3671E8	662.19	293.95	6.9481E6	2876.1	1.2864E5	4.5635E5	302.37	311.3	2.4145E9	2.7540E8
2.9500E-4	2.8711E9	4.4631E8	685.23	294	7.0083E6	2901	1.3282E5	4.7208E5	302.84	312.16	2.4950E9	2.8025E8
3.0000E-4	2.9557E9	4.5569E8	707.24	294.05	7.0695E6	2926.3	1.3767E5	4.8755E5	303.32	313.07	2.5362E9	2.8448E8
3.0500E-4	3.0588E9	4.6510E8	728.62	294.1	7.1314E6	2951.9	1.4372E5	5.0339E5	303.82	314.15	2.5604E9	2.8938E8
3.1000E-4	3.1003E9	4.7528E8	755.45	294.15	7.1974E6	2979.3	1.4730E5	5.2062E5	304.34	315.26	2.6161E9	2.9519E8
3.1500E-4	3.1644E9	4.8526E8	782.4	294.21	7.2650E6	3007.3	1.4939E5	5.3754E5	304.88	317.6	2.7173E9	3.0044E8
3.2000E-4	3.3502E9	4.9365E8	794.59	294.28	7.3240E6	3034	1.5645E5	5.5218E5	305.43	319.5	2.7548E9	3.0377E8
3.2500E-4	3.4954E9	5.0327E8	804.67	294.56	7.3555E6	3053.7	1.6568E5	5.6880E5	306	322.47	2.8507E9	3.2693E8
3.3000E-4	3.4169E9	5.1403E8	851.21	294.66	7.4514E6	3087.2	1.6636E5	5.8857E5	306.58	323.72	2.7956E9	3.1128E8
3.3500E-4	3.4911E9	5.2394E8	877.03	294.72	7.5290E6	3119	1.7097E5	6.0623E5	307.19	324.65	2.8437E9	3.1681E8
3.4000E-4	3.5671E9	5.3391E8	903.13	294.78	7.6050E6	3150.5	1.7582E5	6.2416E5	307.82	325.65	2.8925E9	3.2261E8
3.4500E-4	3.6450E9	5.4390E8	929.47	294.85	7.6826E6	3182.5	1.8069E5	6.4238E5	308.47	326.71	2.9413E9	3.2846E8
3.5000E-4	3.7237E9	5.5401E8	956.54	294.91	7.7623E6	3215.6	1.8568E5	6.6086E5	309.13	327.82	2.9898E9	3.3463E8
3.5500E-4	3.8031E9	5.6393E8	982.96	294.98	7.8436E6	3249.2	1.9030E5	6.7961E5	309.81	328.96	3.0379E9	3.4027E8
3.6000E-4	3.8825E9	5.7401E8	1010.4	295.05	7.9268E6	3283.7	1.9513E5	6.9865E5	310.51	330.14	3.0856E9	3.4633E8
3.6500E-4	3.9620E9	5.8411E8	1038	295.12	8.0119E6	3319.1	1.9991E5	7.1795E5	311.22	331.37	3.1327E9	3.5241E8
3.7000E-4	4.0419E9	5.9424E8	1066.1	295.2	8.0989E6	3355	2.0468E5	7.3754E5	311.95	332.65	3.1792E9	3.5854E8
3.7500E-4	4.1221E9	6.0442E8	1094.7	295.28	8.1877E6	3391.9	2.0944E5	7.5739E5	312.71	333.98	3.2253E9	3.6472E8
3.8000E-4	4.2029E9	6.1462E8	1123.6	295.36	8.2783E6	3429.4	2.1417E5	7.7753E5	313.48	335.36	3.2709E9	3.7091E8
3.8500E-4	4.2840E9	6.2486E8	1153	295.44	8.3708E6	3467.6	2.1887E5	7.9793E5	314.27	336.79	3.3161E9	3.7711E8
3.9000E-4	4.3661E9	6.3513E8	1182.8	295.53	8.4653E6	3506.5	2.2351E5	8.1862E5	315.08	338.26	3.3609E9	3.8330E8
3.9500E-4	4.4492E9	6.4542E8	1213	295.61	8.5616E6	3546.1	2.2807E5	8.3958E5	315.91	339.78	3.4054E9	3.8948E8
4.0000E-4	4.5323E9	6.5575E8	1243.7	295.71	8.6599E6	3586.4	2.3251E5	8.6082E5	316.77	341.35	3.4495E9	3.9567E8
4.0500E-4	4.6164E9	6.6610E8	1274.8	295.8	8.7601E6	3627.6	2.3671E5	8.8233E5	317.64	342.95	3.4933E9	4.0189E8
4.1000E-4	4.6999E9	6.7648E8	1306.5	295.9	8.8622E6	3669.3	2.4070E5	9.0412E5	318.54	344.6	3.5367E9	4.0811E8
4.1500E-4	4.7845E9	6.8689E8	1338.6	296	8.9664E6	3711.8	2.4435E5	9.2619E5	319.46	346.29	3.5799E9	4.1432E8
4.2000E-4	4.8696E9	6.9733E8	1371.2	296.1	9.0725E6	3754.7	2.4757E5	9.4854E5	320.4	348.01	3.6230E9	4.2052E8
4.2500E-4	4.9566E9	7.0779E8	1404.2	296.21	9.1806E6	3798.2	2.5049E5	9.7117E5	321.36	349.76	3.6660E9	4.2674E8
4.3000E-4	5.0450E9	7.1828E8	1437.8	296.32	9.2907E6	3842.2	2.5342E5	9.9408E5	322.34	351.54	3.7088E9	4.3290E8
4.3500E-4	5.1361E9	7.2879E8	1472	296.43	9.4028E6	3887	2.5634E5	1.0173E6	323.35	353.35	3.7517E9	4.3902E8
4.4000E-4	5.2305E9	7.3933E8	1506.6	296.54	9.5170E6	3932.3	2.5922E5	1.0407E6	324.38	355.19	3.7944E9	4.4510E8
4.4500E-4	5.3275E9	7.4989E8	1541.8	296.66	9.6331E6	3978.3	2.6204E5	1.0645E6	325.43	357.06	3.8375E9	4.5112E8
4.5000E-4	5.4268E9	7.6048E8	1577.5	296.78	9.7511E6	4024.6	2.6459E5	1.0885E6	326.5	358.96	3.8811E9	4.5707E8
4.5500E-4	5.5295E9	7.7110E8	1613.7	296.91	9.8712E6	4070.5	2.6677E5	1.1128E6	327.6	360.88	3.9213E9	4.6288E8
4.6000E-4	5.6340E9	7.8173E8	1650.7	297.03	9.9932E6	4116.6	2.6824E5	1.1374E6	328.73	362.82	3.9347E9	4.6859E8
4.6500E-4	5.7402E9	7.9240E8	1688.3	297.16	1.0117E7	4162.2	2.6882E5	1.1623E6	329.87	364.77	3.9316E9	4.7423E8
4.7000E-4	5.8469E9	8.0309E8	1726.5	297.29	1.0243E7	4206.8	2.6914E5	1.1875E6	331.05	366.72	3.9489E9	4.7976E8
4.7500E-4	5.9475E9	8.1380E8	1765.5	297.43	1.0371E7	4251.8	2.6935E5	1.2129E6	332.24	368.67	3.9885E9	4.8519E8
4.8000E-4	6.0458E9	8.2454E8	1805.1	297.57	1.0502E7	4295.9	2.6972E5	1.2387E6	333.46	370.63	4.0280E9	4.9054E8
4.8500E-4	6.1446E9	8.3530E8	1845.4	297.71	1.0634E7	4340.8	2.7013E5	1.2647E6	334.71	372.58	4.0669E9	4.9585E8
4.9000E-4	6.2449E9	8.4608E8	1886.4	297.86	1.0768E7	4386	2.7057E5	1.2910E6	335.98	374.55	4.1003E9	5.0115E8
4.9500E-4	6.3461E9	8.5689E8	1928	298	1.0904E7	4431.7	2.7110E5	1.3176E6	337.28	376.52	4.1265E9	5.0647E8
5.0000E-4	6.4480E9	8.6772E8	1970.3	298.15	1.1043E7	4476.8	2.7173E5	1.3444E6	338.6	378.5	4.1503E9	5.1182E8
5.0500E-4	6.5505E9	8.7856E8	2013.2	298.31	1.1183E7	4523.7	2.7244E5	1.3716E6	339.95	380.5	4.1601E9	5.1723E8
5.1000E-4	6.6559E9	8.8943E8	2056.8	298.47	1.1325E7	4571.1	2.7323E5	1.3990E6	341.33	382.5	4.1724E9	5.2273E8
5.1500E-4	6.7624E9	9.0031E8	2101.1	298.63	1.1468E7	4620.2	2.7409E5	1.4267E6	342.73	384.52	4.1868E9	5.2829E8
5.2000E-4	6.8653E9	9.1122E8	2146	298.79	1.1614E7	4669.8	2.7502E5	1.4546E6	344.16	386.56	4.2014E9	5.3387E8
5.2500E-4	6.9666E9	9.2214E8	2191.5	298.96	1.1762E7	4720.8	2.7591E5	1.4828E6	345.62	388.61	4.2207E9	5.3943E8
5.3000E-4	7.0627E9	9.3309E8	2237.7	299.13	1.1911E7	4771.7	2.7680E5	1.5114E6	347.1	390.67	4.2402E9	5.4493E8
5.3500E-4	7.1612E9	9.4405E8	2284.5	299.3	1.2063E7	4822.9	2.7780E5	1.5401E6	348.62	392.75	4.2608E9	5.5042E8
5.4000E-4	7.2623E9	9.5502E8	2332	299.48	1.2217E7	4876.2	2.7881E5	1.5692E6	350.16	394.84	4.2786E9	5.5596E8
5.4500E-4	7.3656E9	9.6602E8	2380	299.66	1.2372E7	4928.2	2.7979E5	1.5986E6	351.72	396.95	4.2930E9	5.6153E8
5.5000E-4	7.4708E9	9.7703E8	2428.7	299.85	1.2529E7	4981.2	2.8066E5	1.6282E6	353.32	399.07	4.3073E9	5.6707E8
5.5500E-4	7.5760E9	9.8806E8	2477.9	300.04	1.2688E7	5035.7	2.8148E5	1.6581E6	354.94	401.21	4.3232E9	5.7256E8
5.6000E-4	7.6818E9	9.9911E8	2527.9	300.23	1.2848E7	5089.5	2.8216E5	1.6883E6	356.59	403.36	4.3407E9	5.7799E8
5.6500E-4	7.7868E9	1.0102E9	2578.4	300.43	1.3010E7	5143.5	2.8264E5	1.7188E6	358.27	405.52	4.3576E9	5.8332E8
5.7000E-4	7.8949E9	1.0213E9	2629.7	300.63	1.3174E7	5197.3	2.8307E5	1.7496E6	359.98	407.7	4.3755E9	5.8858E8
5.7500E-4	8.0037E9	1.0324E9	2681.6	300.83	1.3340E7	5249.9	2.8361E5	1.7806E6	361.71	409.89	4.3929E9	5.9377E8
5.8000E-4	8.1169E9	1.0435E9	2734.2	301.04	1.3508E7	5302.4	2.8416E5	1.8120E6	363.48	412.09	4.4072E9	5.9893E8
5.8500E-4	8.2122E9	1.0546E9	2787.5	301.25	1.3678E7	5356.9	2.8476E5	1.8436E6	365.27	414.31	4.4277E9	6.0414E8
5.9000E-4	8.2868E9	1.0658E9	2841.6	301.47	1.3849E7	5412.3	2.8525E5	1.8756E6	367.1	416.55	4.4486E9	6.0939E8
5.9500E-4	8.3660E9	1.0769E9	2896.3	301.69	1.4022E7	5469.5	2.8566E5	1.9078E6	368.95	418.8	4.4717E9	6.1465E8
6.0000E-4	8.4777E9	1.0881E9	2951.7	301.91	1.4196E7	5525.4	2.8602E5	1.9403E6	370.84	421.06	4.4935E9	6.1993E8
6.0500E-4	8.5275E9	1.0974E9	3004.7	302.14	1.4358E7	5578.8	2.8601E5	1.9404E6	372.73	423.34	4.4971E9	6.2456E8
6.1000E-4	8.5141E9	1.1062E9	3051.9	302.37	1.4505E7	5626.2	2.8584E5	1.9396E6	374.62	425.62	4.4920E9	6.2892E8
6.1500E-4	8.5244E9	1.1140E9	3087.4	302.6	1.4643E7	5670.2	2.8558E5	1.9413E6	376.51	427.9	4.4873E9	6.3306E8
6.2000E-4	8.5459E9	1.1218E9	3122.5	302.84	1.4778E7	5714.3	2.8526E5	1.9416E6	378.39	430.19	4.4777E9	6.3725E8
6.2500E-4	8.5681E9	1.1290E9	3154.9	303.08	1.4909E7	5756.9	2.8469E5	1.9419E6	380.27	432.47	4.4683E9	6.4117E8
6.3000E-4	8.5961E9	1.1355E9	3185.6	303.32	1.5035E7	5793.8	2.8378E5	1.9422E6	382.15	434.73	4.4588E9	6.4454E8
6.3500E-4	8.6249E9	1.1428E9	3215.1	303.56	1.5161E7	5832.9	2.8333E5	1.9425E6	384.02	437.02	4.4560E9	6.4873E8
6.4000E-4	8.6557E9	1.1502E9	3242.2	303.81	1.5288E7	5872.4	2.8309E5	1.9429E6	385.89	439.3	4.4553E9	6.5317E8
6.4500E-4	8.6835E9	1.1561E9	3268.8	304.06	1.5409E7	5909.9	2.8208E5	1.9432E6	387.76	441.58	4.4493E9	6.5624E8
6.5000E-4	8.7043E9	1.1625E9	3293.6	304.31	1.5527E7	5945.7	2.8151E5	1.9436E6	389.63	443.86	4.4473E9	6.5984E8
6.5500E-4	8.7219E9	1.1684E9	3317.7	304.56	1.5641E7	5980.3	2.8087E5	1.9439E6	391.49	446.14	4.4479E9	6.6313E8
6.6000E-4	8.7422E9	1.1743E9	3340.6	304.81	1.5752E7	6013.2	2.8029E5	1.9442E6	393.35	448.41	4.4450E9	6.6644E8
6.6500E-4	8.7660E9	1.1799E9	3362.7	305.07	1.5862E7	6044.5	2.7971E5	1.9445E6	395.21	450.68	4.4395E9	6.6961E8
6.7000E-4	8.7796E9	1.1854E9	3384	305.33	1.5970E7	6074.5	2.7916E5	1.9449E6	397.06	452.95	4.4370E9	6.7276E8
6.7500E-4	8.7827E9	1.1907E9	3404.7	305.58	1.6076E7	6104.8	2.7864E5	1.9452E6	398.91	455.21	4.4371E9	6.7583E8
6.8000E-4	8.7898E9	1.1958E9	3424.9	305.85	1.6179E7	6133.6	2.7810E5	1.9455E6	400.76	457.47	4.4372E9	6.7884E8
6.8500E-4	8.8040E9	1.2008E9	3444.6	306.11	1.6280E7	6161.6	2.7759E5	1.9459E6	402.61	459.73	4.4369E9	6.8176E8
6.9000E-4	8.8094E9	1.2057E9	3463.9	306.37	1.6380E7	6187.9	2.7711E5	1.9462E6	404.45	461.98	4.4393E9	6.8463E8
6.9500E-4	8.8211E9	1.2104E9	3482.8	306.64	1.6477E7	6214.9	2.7666E5	1.9465E6	406.29	464.23	4.4455E9	6.8742E8
7.0000E-4	8.8416E9	1.2150E9	3501.4	306.91	1.6572E7	6242	2.7625E5	1.9469E6	408.13	466.47	4.4508E9	6.9012E8
7.0500E-4	8.8544E9	1.2195E9	3519.7	307.18	1.6666E7	6268.1	2.7582E5	1.9472E6	409.96	468.71	4.4549E9	6.9276E8
7.1000E-4	8.8550E9	1.2238E9	3537.9	307.45	1.6758E7	6292.7	2.7539E5	1.9476E6	411.79	470.95	4.4599E9	6.9534E8
7.1500E-4	8.8590E9	1.2281E9	3555.8	307.73	1.6848E7	6316.4	2.7498E5	1.9479E6	413.62	473.19	4.4656E9	6.9788E8
7.2000E-4	8.8686E9	1.2322E9	3573.7	308	1.6937E7	6340.3	2.7458E5	1.9483E6	415.45	475.43	4.4711E9	7.0038E8
7.2500E-4	8.8790E9	1.2363E9	3591.5	308.28	1.7024E7	6362.6	2.7416E5	1.9486E6	417.28	477.67	4.4761E9	7.0283E8
7.3000E-4	8.8884E9	1.2402E9	3609.2	308.55	1.7109E7	6384.8	2.7374E5	1.9490E6	419.1	479.91	4.4810E9	7.0523E8
7.3500E-4	8.8960E9	1.2440E9	3626.8	308.83	1.7193E7	6405.9	2.7336E5	1.9493E6	420.92	482.14	4.4870E9	7.0757E8
7.4000E-4	8.9014E9	1.2477E9	3644.4	309.11	1.7275E7	6426.2	2.7296E5	1.9497E6	422.74	484.37	4.4933E9	7.0982E8
7.4500E-4	8.9051E9	1.2514E9	3662	309.4	1.7356E7	6449.2	2.7253E5	1.9501E6	424.55	486.6	4.4984E9	7.1204E8
7.5000E-4	8.9081E9	1.2549E9	3679.7	309.68	1.7436E7	6469.8	2.7210E5	1.9504E6	426.37	488.83	4.5022E9	7.1420E8
7.5500E-4	8.9111E9	1.2584E9	3697.3	309.96	1.7514E7	6487.8	2.7167E5	1.9508E6	428.18	491.06	4.5054E9	7.1633E8
7.6000E-4	8.9148E9	1.2618E9	3715	310.25	1.7591E7	6504	2.7122E5	1.9512E6	429.99	493.28	4.5091E9	7.1842E8
7.6500E-4	8.9196E9	1.2651E9	3732.8	310.54	1.7668E7	6522.6	2.7075E5	1.9515E6	431.8	495.5	4.5133E9	7.2049E8
7.7000E-4	8.9224E9	1.2683E9	3750.6	310.83	1.7742E7	6540.2	2.7032E5	1.9519E6	433.6	497.72	4.5173E9	7.2253E8
7.7500E-4	8.9201E9	1.2715E9	3768.5	311.11	1.7816E7	6557.6	2.6994E5	1.9523E6	435.4	499.93	4.5203E9	7.2454E8
7.8000E-4	8.9182E9	1.2745E9	3786.4	311.41	1.7888E7	6573.3	2.6957E5	1.9527E6	437.21	502.14	4.5240E9	7.2651E8
7.8500E-4	8.9206E9	1.2776E9	3804.5	311.7	1.7959E7	6587.8	2.6920E5	1.9530E6	439.01	504.34	4.5295E9	7.2844E8
7.9000E-4	8.9257E9	1.2805E9	3822.7	311.99	1.8030E7	6603.3	2.6883E5	1.9534E6	440.8	506.54	4.5348E9	7.3034E8
7.9500E-4	8.9303E9	1.2834E9	3841.1	312.29	1.8099E7	6616.5	2.6848E5	1.9538E6	442.6	508.73	4.5376E9	7.3219E8
8.0000E-4	8.9320E9	1.2862E9	3859.5	312.58	1.8166E7	6628.5	2.6814E5	1.9542E6	444.39	510.93	4.5390E9	7.3403E8
8.0500E-4	8.9333E9	1.2889E9	3878.1	312.88	1.8233E7	6639	2.6783E5	1.9546E6	446.18	513.12	4.5413E9	7.3583E8
8.1000E-4	8.9365E9	1.2916E9	3896.8	313.17	1.8299E7	6650	2.6753E5	1.9550E6	447.97	515.31	4.5458E9	7.3758E8
8.1500E-4	8.9385E9	1.2942E9	3915.7	313.47	1.8364E7	6660.3	2.6727E5	1.9554E6	449.76	517.49	4.5508E9	7.3928E8
8.2000E-4	8.9385E9	1.2968E9	3934.7	313.77	1.8427E7	6671.9	2.6700E5	1.9558E6	451.55	519.67	4.5543E9	7.4095E8
8.2500E-4	8.9392E9	1.2993E9	3953.8	314.07	1.8490E7	6680.9	2.6673E5	1.9562E6	453.33	521.85	4.5565E9	7.4257E8
8.3000E-4	8.9426E9	1.3018E9	3973.1	314.38	1.8552E7	6691.6	2.6648E5	1.9566E6	455.11	524.03	4.5588E9	7.4417E8
8.3500E-4	8.9455E9	1.3042E9	3992.6	314.68	1.8613E7	6701.5	2.6623E5	1.9570E6	456.89	526.21	4.5622E9	7.4577E8
8.4000E-4	8.9445E9	1.3066E9	4012.2	314.98	1.8672E7	6708.3	2.6598E5	1.9574E6	458.67	528.38	4.5650E9	7.4734E8
8.4500E-4	8.9414E9	1.3089E9	4031.9	315.29	1.8731E7	6716.1	2.6573E5	1.9578E6	460.45	530.54	4.5670E9	7.4888E8
8.5000E-4	8.9381E9	1.3112E9	4051.8	315.59	1.8789E7	6725.3	2.6550E5	1.9582E6	462.22	532.7	4.5690E9	7.5039E8
8.5500E-4	8.9341E9	1.3134E9	4071.8	315.9	1.8846E7	6729.5	2.6530E5	1.9586E6	464	534.86	4.5709E9	7.5188E8
8.6000E-4	8.9278E9	1.3156E9	4092	316.2	1.8902E7	6737.7	2.6513E5	1.9590E6	465.77	537.01	4.5725E9	7.5337E8
8.6500E-4	8.9218E9	1.3177E9	4112.4	316.51	1.8957E7	6745.8	2.6498E5	1.9594E6	467.54	539.16	4.5742E9	7.5484E8
8.7000E-4	8.9191E9	1.3198E9	4132.9	316.82	1.9012E7	6753.4	2.6481E5	1.9598E6	469.31	541.3	4.5762E9	7.5629E8
8.7500E-4	8.9185E9	1.3219E9	4153.6	317.13	1.9065E7	6760.6	2.6463E5	1.9603E6	471.08	543.44	4.5816E9	7.5773E8
8.8000E-4	8.9161E9	1.3239E9	4174.4	317.44	1.9118E7	6764.6	2.6448E5	1.9607E6	472.84	545.57	4.5920E9	7.5916E8
8.8500E-4	8.9097E9	1.3258E9	4195.3	317.75	1.9171E7	6771.5	2.6436E5	1.9611E6	474.61	547.7	4.6024E9	7.6057E8
8.9000E-4	8.9014E9	1.3278E9	4216.4	318.06	1.9222E7	6778.6	2.6423E5	1.9615E6	476.37	549.82	4.6091E9	7.6195E8
8.9500E-4	8.8961E9	1.3297E9	4237.6	318.38	1.9273E7	6784.8	2.6407E5	1.9619E6	478.13	551.94	4.6137E9	7.6331E8
9.0000E-4	8.8948E9	1.3315E9	4259.1	318.69	1.9323E7	6788.4	2.6385E5	1.9624E6	479.89	554.06	4.6204E9	7.6463E8
9.0500E-4	8.8929E9	1.3334E9	4280.6	319.01	1.9372E7	6792.2	2.6367E5	1.9628E6	481.65	556.17	4.6304E9	7.6593E8
9.1000E-4	8.8870E9	1.3352E9	4302.4	319.32	1.9421E7	6796.9	2.6355E5	1.9632E6	483.4	558.27	4.6402E9	7.6720E8
9.1500E-4	8.8785E9	1.3369E9	4324.2	319.64	1.9469E7	6798.3	2.6349E5	1.9637E6	485.16	560.37	4.6465E9	7.6846E8
9.2000E-4	8.8723E9	1.3387E9	4346.2	319.95	1.9516E7	6801.4	2.6344E5	1.9641E6	486.91	562.46	4.6509E9	7.6970E8
9.2500E-4	8.8675E9	1.3404E9	4368.4	320.27	1.9563E7	6802	2.6337E5	1.9645E6	488.66	564.56	4.6575E9	7.7092E8
9.3000E-4	8.8669E9	1.3420E9	4390.8	320.59	1.9609E7	6805	2.6330E5	1.9650E6	490.41	566.64	4.6669E9	7.7212E8
9.3500E-4	8.8658E9	1.3437E9	4413.2	320.91	1.9654E7	6808.4	2.6326E5	1.9654E6	492.16	568.73	4.6756E9	7.7330E8
9.4000E-4	8.8625E9	1.3453E9	4435.8	321.23	1.9699E7	6807.2	2.6327E5	1.9658E6	493.91	570.81	4.6813E9	7.7448E8
9.4500E-4	8.8591E9	1.3469E9	4458.5	321.55	1.9744E7	6814.9	2.6330E5	1.9663E6	495.66	572.89	4.6861E9	7.7565E8
9.5000E-4	8.8572E9	1.3485E9	4481.3	321.87	1.9787E7	6812.8	2.6332E5	1.9667E6	497.4	574.97	4.6930E9	7.7684E8
9.5500E-4	8.8573E9	1.3500E9	4504.3	322.19	1.9831E7	6818	2.6327E5	1.9672E6	499.15	577.04	4.7021E9	7.7798E8
9.6000E-4	8.8584E9	1.3515E9	4527.4	322.51	1.9873E7	6817.2	2.6330E5	1.9676E6	500.89	579.11	4.7109E9	7.7917E8
9.6500E-4	8.8582E9	1.3530E9	4550.6	322.83	1.9915E7	6823.6	2.6319E5	1.9682E6	502.63	581.18	4.7180E9	7.8020E8
9.7000E-4	8.8567E9	1.3544E9	4574.1	323.16	1.9957E7	6821.1	2.6349E5	1.9684E6	504.37	583.24	4.7249E9	7.8147E8
9.7500E-4	8.8544E9	1.3559E9	4597.5	323.48	1.9998E7	6827.6	2.6304E5	1.9694E6	506.11	585.31	4.7329E9	7.8219E8
9.8000E-4	8.8538E9	1.3573E9	4621.5	323.8	2.0040E7	6826.5	2.6403E5	1.9688E6	507.85	587.36	4.7422E9	7.8396E8
9.8500E-4	8.8534E9	1.3585E9	4643.2	324.13	2.0079E7	6825.7	2.6291E5	1.9701E6	509.58	589.42	4.7503E9	7.8436E8
9.9000E-4	8.8541E9	1.3599E9	4667.7	324.45	2.0118E7	6825	2.6230E5	1.9712E6	511.32	591.5	4.7572E9	7.8494E8
9.9500E-4	8.8561E9	1.3606E9	4684.1	324.78	2.0155E7	6821.5	2.6262E5	1.9703E6	513.05	593.51	4.7645E9	7.8583E8
0.001	8.8565E9	1.3624E9	4713.8	325.11	2.0196E7	6817.4	2.6303E5	1.9711E6	514.78	595.54	4.7717E9	7.8745E8
0.001005	8.8572E9	1.3637E9	4737.5	325.43	2.0236E7	6821.3	2.6313E5	1.9717E6	516.51	597.55	4.7786E9	7.8824E8
0.00101	8.8590E9	1.3650E9	4761.8	325.76	2.0275E7	6817.3	2.6315E5	1.9723E6	518.24	599.57	4.7853E9	7.8921E8
0.001015	8.8622E9	1.3662E9	4785.8	326.09	2.0313E7	6812.7	2.6323E5	1.9727E6	519.97	601.57	4.7920E9	7.9020E8
0.00102	8.8666E9	1.3675E9	4810.6	326.42	2.0351E7	6813.5	2.6332E5	1.9732E6	521.7	603.58	4.7982E9	7.9122E8
0.001025	8.8710E9	1.3687E9	4834.8	326.74	2.0388E7	6807.9	2.6342E5	1.9737E6	523.42	605.58	4.8044E9	7.9220E8
0.00103	8.8750E9	1.3700E9	4860.2	327.07	2.0425E7	6809.7	2.6352E5	1.9742E6	525.15	607.58	4.8105E9	7.9320E8
0.001035	8.8788E9	1.3711E9	4884.3	327.4	2.0461E7	6799	2.6361E5	1.9746E6	526.87	609.58	4.8166E9	7.9416E8
0.00104	8.8820E9	1.3724E9	4910.4	327.73	2.0497E7	6809.2	2.6370E5	1.9752E6	528.6	611.57	4.8220E9	7.9516E8
0.001045	8.8857E9	1.3734E9	4934.1	328.06	2.0531E7	6796.6	2.6376E5	1.9755E6	530.32	613.56	4.8270E9	7.9611E8
0.00105	8.8900E9	1.3747E9	4961.3	328.4	2.0567E7	6805.9	2.6389E5	1.9763E6	532.04	615.55	4.8323E9	7.9707E8
0.001055	8.8944E9	1.3756E9	4983.8	328.73	2.0600E7	6793.9	2.6393E5	1.9763E6	533.76	617.52	4.8380E9	7.9798E8
0.00106	8.8982E9	1.3769E9	5012.6	329.06	2.0634E7	6786.6	2.6419E5	1.9770E6	535.47	619.5	4.8443E9	7.9921E8
0.001065	8.9019E9	1.3779E9	5036.5	329.39	2.0667E7	6799.9	2.6424E5	1.9775E6	537.19	621.48	4.8508E9	7.9990E8
0.00107	8.9054E9	1.3790E9	5062.2	329.73	2.0701E7	6781.5	2.6435E5	1.9781E6	538.91	623.44	4.8571E9	8.0067E8
0.001075	8.9075E9	1.3802E9	5089.8	330.06	2.0734E7	6771.2	2.6457E5	1.9786E6	540.62	625.41	4.8629E9	8.0185E8
0.00108	8.9081E9	1.3812E9	5114	330.39	2.0766E7	6795.8	2.6463E5	1.9791E6	542.34	627.36	4.8683E9	8.0251E8
0.001085	8.9022E9	1.3823E9	5141.2	330.73	2.0798E7	6782.8	2.6483E5	1.9796E6	544.05	629.32	4.8735E9	8.0353E8
0.00109	8.8944E9	1.3832E9	5165.8	331.06	2.0830E7	6783.1	2.6489E5	1.9801E6	545.76	631.26	4.8783E9	8.0416E8
0.001095	8.8855E9	1.3842E9	5191.3	331.4	2.0861E7	6776.8	2.6497E5	1.9805E6	547.47	633.2	4.8832E9	8.0493E8
0.0011	8.8761E9	1.3852E9	5217.6	331.74	2.0893E7	6763.7	2.6510E5	1.9811E6	549.18	635.13	4.8880E9	8.0573E8
0.001105	8.8682E9	1.3862E9	5243.5	332.07	2.0924E7	6772.9	2.6524E5	1.9815E6	550.89	637.06	4.8927E9	8.0656E8
0.00111	8.8631E9	1.3872E9	5270.4	332.41	2.0955E7	6755.2	2.6539E5	1.9821E6	552.6	638.98	4.8973E9	8.0736E8
0.001115	8.8596E9	1.3881E9	5295.9	332.75	2.0985E7	6760.9	2.6552E5	1.9825E6	554.3	640.89	4.9022E9	8.0819E8
0.00112	8.8563E9	1.3892E9	5323.7	333.08	2.1016E7	6750.1	2.6567E5	1.9832E6	556.01	642.81	4.9072E9	8.0896E8
0.001125	8.8530E9	1.3899E9	5348.1	333.42	2.1044E7	6747.4	2.6577E5	1.9834E6	557.71	644.71	4.9123E9	8.0977E8
0.00113	8.8489E9	1.3911E9	5378.1	333.76	2.1076E7	6732.6	2.6600E5	1.9844E6	559.42	646.61	4.9173E9	8.1050E8
0.001135	8.8454E9	1.3916E9	5399.4	334.1	2.1102E7	6742	2.6606E5	1.9842E6	561.12	648.5	4.9223E9	8.1133E8
0.00114	8.8420E9	1.3932E9	5434.7	334.44	2.1136E7	6720.1	2.6643E5	1.9859E6	562.82	650.39	4.9270E9	8.1197E8
0.001145	8.8410E9	1.3930E9	5447.8	334.77	2.1157E7	6731.5	2.6637E5	1.9845E6	564.52	652.26	4.9325E9	8.1291E8
0.00115	8.8384E9	1.3957E9	5496.9	335.11	2.1198E7	6706.8	2.6715E5	1.9882E6	566.22	654.17	4.9380E9	8.1337E8
0.001155	8.8374E9	1.3962E9	5520.9	335.46	2.1226E7	6687.9	2.6753E5	1.9873E6	567.92	656.11	4.9439E9	8.1450E8
0.00116	8.8350E9	1.3967E9	5542.5	335.8	2.1251E7	6708.1	2.6714E5	1.9877E6	569.62	658	4.9495E9	8.1484E8
0.001165	8.8345E9	1.3975E9	5570.6	336.14	2.1276E7	6698.6	2.6765E5	1.9878E6	571.32	659.86	4.9558E9	8.1604E8
0.00117	8.8332E9	1.3983E9	5596.7	336.48	2.1303E7	6684.5	2.6776E5	1.9886E6	573.01	661.72	4.9621E9	8.1631E8
0.001175	8.8314E9	1.3987E9	5617.8	336.82	2.1327E7	6661.7	2.6789E5	1.9884E6	574.71	663.56	4.9685E9	8.1696E8
0.00118	8.8284E9	1.4002E9	5653.3	337.16	2.1359E7	6671.9	2.6830E5	1.9901E6	576.4	665.41	4.9746E9	8.1760E8
0.001185	8.8255E9	1.4009E9	5680.3	337.5	2.1385E7	6645.9	2.6864E5	1.9900E6	578.09	667.26	4.9803E9	8.1871E8
0.00119	8.8221E9	1.4016E9	5706.1	337.85	2.1411E7	6676.1	2.6871E5	1.9908E6	579.79	669.1	4.9857E9	8.1907E8
0.001195	8.8204E9	1.4024E9	5734.8	338.19	2.1436E7	6644.8	2.6907E5	1.9910E6	581.48	670.93	4.9909E9	8.2010E8
0.0012	8.8182E9	1.4032E9	5760.7	338.53	2.1462E7	6643.2	2.6918E5	1.9917E6	583.17	672.75	4.9960E9	8.2036E8
0.001205	8.8165E9	1.4036E9	5783.8	338.88	2.1486E7	6605.8	2.6930E5	1.9917E6	584.86	674.56	5.0012E9	8.2094E8
0.00121	8.8139E9	1.4045E9	5814.4	339.22	2.1512E7	6586.4	2.6968E5	1.9924E6	586.55	676.36	5.0064E9	8.2178E8
0.001215	8.8118E9	1.4053E9	5840.5	339.56	2.1537E7	6634.4	2.6997E5	1.9930E6	588.24	678.14	5.0117E9	8.2229E8
0.00122	8.8134E9	1.4062E9	5871.8	339.91	2.1563E7	6595.2	2.7039E5	1.9936E6	589.93	679.93	5.0169E9	8.2320E8
0.001225	8.8148E9	1.4068E9	5896.2	340.25	2.1587E7	6597.1	2.7051E5	1.9941E6	591.61	681.72	5.0221E9	8.2356E8
0.00123	8.8158E9	1.4076E9	5924.3	340.6	2.1613E7	6549.5	2.7076E5	1.9947E6	593.3	683.49	5.0277E9	8.2405E8
0.001235	8.8163E9	1.4084E9	5953.9	340.94	2.1637E7	6526	2.7113E5	1.9952E6	594.98	685.25	5.0337E9	8.2489E8
0.00124	8.8166E9	1.4091E9	5983.4	341.29	2.1661E7	6515.2	2.7149E5	1.9957E6	596.67	687.01	5.0394E9	8.2574E8
0.001245	8.8181E9	1.4097E9	6008.2	341.63	2.1685E7	6554.9	2.7167E5	1.9963E6	598.35	688.75	5.0452E9	8.2606E8
0.00125	8.8201E9	1.4106E9	6039.9	341.98	2.1709E7	6536.8	2.7210E5	1.9968E6	600.03	690.49	5.0510E9	8.2707E8
0.001255	8.8221E9	1.4113E9	6066.9	342.32	2.1733E7	6503.3	2.7237E5	1.9973E6	601.71	692.22	5.0578E9	8.2758E8
0.00126	8.8242E9	1.4119E9	6094.5	342.67	2.1756E7	6504.6	2.7263E5	1.9979E6	603.4	693.95	5.0646E9	8.2809E8
0.001265	8.8273E9	1.4126E9	6121.6	343.02	2.1779E7	6490.2	2.7293E5	1.9984E6	605.08	695.66	5.0713E9	8.2863E8
0.00127	8.8308E9	1.4133E9	6151.2	343.36	2.1803E7	6465.7	2.7331E5	1.9990E6	606.76	697.37	5.0783E9	8.2942E8
0.001275	8.8347E9	1.4140E9	6178.6	343.71	2.1826E7	6464.1	2.7358E5	1.9995E6	608.43	699.08	5.0856E9	8.2991E8
0.00128	8.8387E9	1.4146E9	6205.6	344.06	2.1849E7	6437.9	2.7387E5	2.0001E6	610.11	700.78	5.0930E9	8.3042E8
0.001285	8.8452E9	1.4154E9	6235.5	344.41	2.1871E7	6444.6	2.7430E5	2.0007E6	611.79	702.46	5.1002E9	8.3122E8
0.00129	8.8517E9	1.4160E9	6263	344.75	2.1894E7	6431.2	2.7457E5	2.0012E6	613.47	704.15	5.1073E9	8.3164E8
0.001295	8.8574E9	1.4167E9	6291.8	345.1	2.1916E7	6440.8	2.7496E5	2.0018E6	615.14	705.82	5.1144E9	8.3234E8
0.0013	8.8631E9	1.4173E9	6319.5	345.45	2.1939E7	6392.2	2.7525E5	2.0023E6	616.82	707.48	5.1215E9	8.3279E8
0.001305	8.8682E9	1.4180E9	6348.2	345.8	2.1961E7	6443.7	2.7561E5	2.0029E6	618.49	709.13	5.1285E9	8.3346E8
0.00131	8.8735E9	1.4186E9	6376.5	346.15	2.1983E7	6361.1	2.7593E5	2.0035E6	620.16	710.78	5.1355E9	8.3395E8
0.001315	8.8857E9	1.4192E9	6404.7	346.5	2.2004E7	6372.4	2.7628E5	2.0040E6	621.84	712.41	5.1426E9	8.3454E8
0.00132	8.8968E9	1.4198E9	6431.7	346.85	2.2026E7	6358.7	2.7659E5	2.0046E6	623.51	714.04	5.1499E9	8.3499E8
0.001325	8.9079E9	1.4205E9	6460.6	347.2	2.2047E7	6343.7	2.7698E5	2.0052E6	625.18	715.65	5.1572E9	8.3562E8
0.00133	8.9187E9	1.4210E9	6486.7	347.55	2.2069E7	6340.5	2.7732E5	2.0057E6	626.85	717.24	5.1644E9	8.3601E8
0.001335	8.9299E9	1.4217E9	6516.6	347.89	2.2090E7	6323.6	2.7776E5	2.0063E6	628.52	718.83	5.1717E9	8.3673E8
0.00134	8.9414E9	1.4223E9	6546.7	348.24	2.2112E7	6303.9	2.7820E5	2.0069E6	630.19	720.41	5.1790E9	8.3743E8
0.001345	8.9539E9	1.4229E9	6574.7	348.59	2.2133E7	6288.6	2.7859E5	2.0075E6	631.86	721.99	5.1863E9	8.3795E8
0.00135	8.9664E9	1.4235E9	6603.3	348.94	2.2153E7	6281.8	2.7901E5	2.0080E6	633.53	723.55	5.1944E9	8.3851E8
0.001355	8.9789E9	1.4240E9	6628.9	349.3	2.2174E7	6276.3	2.7935E5	2.0086E6	635.2	725.1	5.2027E9	8.3880E8
0.00136	8.9940E9	1.4246E9	6656.7	349.65	2.2194E7	6267.7	2.7977E5	2.0092E6	636.86	726.64	5.2110E9	8.3929E8
0.001365	9.0095E9	1.4252E9	6685	350	2.2215E7	6250.8	2.8022E5	2.0098E6	638.53	728.17	5.2191E9	8.3983E8
0.00137	9.0248E9	1.4258E9	6713.4	350.35	2.2236E7	6237.6	2.8067E5	2.0104E6	640.2	729.68	5.2272E9	8.4037E8
0.001375	9.0402E9	1.4263E9	6741.8	350.7	2.2257E7	6227	2.8113E5	2.0109E6	641.86	731.19	5.2356E9	8.4091E8
0.00138	9.0550E9	1.4269E9	6770.3	351.05	2.2277E7	6219.4	2.8158E5	2.0115E6	643.52	732.69	5.2445E9	8.4144E8
0.001385	9.0711E9	1.4276E9	6801	351.4	2.2298E7	6193.5	2.8208E5	2.0121E6	645.19	734.2	5.2537E9	8.4216E8
0.00139	9.0880E9	1.4281E9	6830.4	351.75	2.2317E7	6178.2	2.8257E5	2.0127E6	646.85	735.68	5.2634E9	8.4273E8
0.001395	9.1052E9	1.4286E9	6856.3	352.1	2.2337E7	6162.6	2.8298E5	2.0133E6	648.51	737.16	5.2743E9	8.4303E8
0.0014	9.1226E9	1.4292E9	6884.1	352.45	2.2357E7	6160.6	2.8348E5	2.0139E6	650.18	738.61	5.2863E9	8.4344E8
0.001405	9.1402E9	1.4297E9	6912.4	352.81	2.2376E7	6150.2	2.8398E5	2.0145E6	651.84	740.07	5.2984E9	8.4393E8
0.00141	9.1595E9	1.4303E9	6940.9	353.16	2.2396E7	6120.3	2.8453E5	2.0151E6	653.5	741.51	5.3102E9	8.4435E8
0.001415	9.1831E9	1.4308E9	6969.3	353.51	2.2416E7	6131.7	2.8504E5	2.0158E6	655.16	742.96	5.3225E9	8.4487E8
0.00142	9.2072E9	1.4314E9	6997.8	353.86	2.2435E7	6082.5	2.8560E5	2.0164E6	656.82	744.38	5.3365E9	8.4525E8
0.001425	9.2291E9	1.4320E9	7029.3	354.22	2.2455E7	6037.8	2.8621E5	2.0170E6	658.48	745.82	5.3532E9	8.4598E8
0.00143	9.2515E9	1.4325E9	7058.1	354.57	2.2474E7	6018.5	2.8677E5	2.0176E6	660.13	747.23	5.3682E9	8.4648E8
0.001435	9.2756E9	1.4330E9	7083.8	354.92	2.2493E7	6045.3	2.8721E5	2.0182E6	661.79	748.63	5.3827E9	8.4674E8
0.00144	9.2977E9	1.4336E9	7114.3	355.27	2.2512E7	6025.9	2.8784E5	2.0188E6	663.45	750.01	5.3981E9	8.4741E8
0.001445	9.3176E9	1.4341E9	7142.8	355.63	2.2531E7	6003.4	2.8841E5	2.0195E6	665.1	751.38	5.4141E9	8.4791E8
0.00145	9.3397E9	1.4345E9	7169.1	355.98	2.2549E7	6006.2	2.8882E5	2.0201E6	666.76	752.77	5.4293E9	8.4823E8
0.001455	9.3602E9	1.4351E9	7199.4	356.33	2.2568E7	5946.1	2.8940E5	2.0207E6	668.42	754.13	5.4424E9	8.4891E8
0.00146	9.3798E9	1.4355E9	7225.9	356.68	2.2587E7	5948.4	2.8999E5	2.0213E6	670.07	755.46	5.4536E9	8.4920E8
0.001465	9.3991E9	1.4360E9	7253.8	357.04	2.2606E7	5907.7	2.9049E5	2.0220E6	671.73	756.81	5.4649E9	8.4974E8
0.00147	9.4194E9	1.4366E9	7284.6	357.39	2.2624E7	5869.3	2.9115E5	2.0226E6	673.38	758.15	5.4766E9	8.5049E8
0.001475	9.4393E9	1.4371E9	7312.7	357.74	2.2643E7	5800.3	2.9181E5	2.0232E6	675.03	759.46	5.4892E9	8.5101E8
0.00148	9.4576E9	1.4376E9	7342.2	358.1	2.2661E7	5845.4	2.9249E5	2.0239E6	676.68	760.75	5.5027E9	8.5166E8
0.001485	9.4763E9	1.4381E9	7369.2	358.45	2.2679E7	5823.9	2.9307E5	2.0245E6	678.34	762.05	5.5158E9	8.5208E8
0.00149	9.4950E9	1.4386E9	7396.7	358.8	2.2697E7	5783.5	2.9368E5	2.0251E6	679.99	763.34	5.5308E9	8.5261E8
0.001495	9.5122E9	1.4391E9	7426.8	359.16	2.2716E7	5764.2	2.9438E5	2.0258E6	681.64	764.62	5.5473E9	8.5335E8
0.0015	9.5293E9	1.4395E9	7452.6	359.51	2.2734E7	5821.8	2.9497E5	2.0265E6	683.29	765.88	5.5637E9	8.5378E8
0.001505	9.5462E9	1.4401E9	7483.3	359.86	2.2752E7	5768.9	2.9568E5	2.0271E6	684.94	767.15	5.5804E9	8.5455E8
0.00151	9.5633E9	1.4405E9	7509.1	360.22	2.2769E7	5781.5	2.9626E5	2.0278E6	686.59	768.41	5.5980E9	8.5489E8
0.001515	9.5805E9	1.4409E9	7536.7	360.57	2.2787E7	5681.4	2.9689E5	2.0284E6	688.24	769.66	5.6156E9	8.5541E8
0.00152	9.5977E9	1.4415E9	7567.1	360.93	2.2805E7	5679.5	2.9765E5	2.0291E6	689.89	770.9	5.6324E9	8.5612E8
0.001525	9.6144E9	1.4419E9	7596.1	361.28	2.2823E7	5634.4	2.9837E5	2.0298E6	691.53	772.13	5.6493E9	8.5683E8
0.00153	9.6348E9	1.4424E9	7623.6	361.64	2.2840E7	5684.1	2.9900E5	2.0304E6	693.18	773.36	5.6653E9	8.5734E8
0.001535	9.6578E9	1.4428E9	7649.9	361.99	2.2857E7	5616.1	2.9969E5	2.0311E6	694.83	774.58	5.6806E9	8.5775E8
0.00154	9.6815E9	1.4433E9	7677.7	362.35	2.2875E7	5714.3	3.0043E5	2.0318E6	696.48	775.78	5.6961E9	8.5829E8
0.001545	9.7043E9	1.4437E9	7705.7	362.7	2.2892E7	5535	3.0117E5	2.0324E6	698.12	777	5.7117E9	8.5881E8
0.00155	9.7245E9	1.4442E9	7737.1	363.05	2.2910E7	5701.4	3.0212E5	2.0331E6	699.77	778.18	5.7280E9	8.5980E8
0.001555	9.7459E9	1.4447E9	7765.1	363.41	2.2927E7	5584.8	3.0282E5	2.0338E6	701.41	779.39	5.7442E9	8.6029E8
0.00156	9.7674E9	1.4451E9	7793.1	363.76	2.2944E7	5550.7	3.0356E5	2.0345E6	703.06	780.59	5.7591E9	8.6084E8
0.001565	9.7877E9	1.4456E9	7821	364.12	2.2961E7	5539.9	3.0430E5	2.0352E6	704.7	781.77	5.7727E9	8.6144E8
0.00157	9.8055E9	1.4460E9	7847.7	364.47	2.2978E7	5528.2	3.0505E5	2.0358E6	706.34	782.95	5.7859E9	8.6196E8
0.001575	9.8224E9	1.4465E9	7876.8	364.83	2.2995E7	5525.4	3.0587E5	2.0365E6	707.99	784.12	5.7987E9	8.6270E8
0.00158	9.8397E9	1.4469E9	7902.7	365.19	2.3012E7	5622.5	3.0668E5	2.0372E6	709.63	785.28	5.8117E9	8.6326E8
0.001585	9.8575E9	1.4474E9	7932.9	365.54	2.3029E7	5529	3.0752E5	2.0379E6	711.27	786.45	5.8247E9	8.6406E8
0.00159	9.8750E9	1.4478E9	7960.8	365.9	2.3045E7	5504.2	3.0826E5	2.0386E6	712.91	787.62	5.8378E9	8.6461E8
0.001595	9.8922E9	1.4482E9	7987.6	366.25	2.3062E7	5503.7	3.0907E5	2.0393E6	714.55	788.77	5.8510E9	8.6521E8
0.0016	9.9093E9	1.4486E9	8016.3	366.61	2.3078E7	5510.2	3.0990E5	2.0400E6	716.2	789.92	5.8649E9	8.6595E8
0.001605	9.9267E9	1.4490E9	8042.2	366.96	2.3095E7	5493.8	3.1072E5	2.0408E6	717.84	791.07	5.8778E9	8.6651E8
0.00161	9.9438E9	1.4495E9	8072.5	367.32	2.3111E7	5536.6	3.1173E5	2.0415E6	719.48	792.19	5.8888E9	8.6744E8
0.001615	9.9604E9	1.4499E9	8100.3	367.68	2.3127E7	5443.3	3.1253E5	2.0422E6	721.11	793.34	5.9014E9	8.6801E8
0.00162	9.9772E9	1.4503E9	8127.1	368.03	2.3144E7	5460.5	3.1336E5	2.0429E6	722.75	794.47	5.9143E9	8.6862E8
0.001625	9.9945E9	1.4507E9	8153.3	368.39	2.3160E7	5438.7	3.1428E5	2.0437E6	724.39	795.6	5.9271E9	8.6925E8
0.00163	1.0013E10	1.4512E9	8183.6	368.75	2.3176E7	5420.1	3.1529E5	2.0444E6	726.03	796.73	5.9402E9	8.7015E8
0.001635	1.0033E10	1.4516E9	8209	369.1	2.3192E7	5535.5	3.1620E5	2.0452E6	727.67	797.83	5.9536E9	8.7071E8
0.00164	1.0052E10	1.4520E9	8238.7	369.46	2.3208E7	5513.5	3.1722E5	2.0459E6	729.31	798.97	5.9677E9	8.7157E8
0.001645	1.0072E10	1.4524E9	8265.8	369.82	2.3224E7	5473.1	3.1813E5	2.0467E6	730.94	800.1	5.9816E9	8.7217E8
0.00165	1.0091E10	1.4528E9	8292.4	370.17	2.3240E7	5360.7	3.1903E5	2.0474E6	732.58	801.21	5.9953E9	8.7283E8
0.001655	1.0111E10	1.4532E9	8319	370.53	2.3255E7	5512.6	3.2003E5	2.0482E6	734.21	802.32	6.0096E9	8.7347E8
0.00166	1.0128E10	1.4537E9	8349.2	370.89	2.3272E7	5680.3	3.2115E5	2.0489E6	735.85	803.41	6.0249E9	8.7459E8
0.001665	1.0144E10	1.4541E9	8376.8	371.24	2.3287E7	5497.6	3.2207E5	2.0497E6	737.49	804.55	6.0401E9	8.7517E8
0.00167	1.0160E10	1.4545E9	8404.3	371.6	2.3303E7	5532.6	3.2307E5	2.0505E6	739.12	805.68	6.0554E9	8.7591E8
0.001675	1.0175E10	1.4549E9	8431.7	371.96	2.3318E7	5371.1	3.2406E5	2.0513E6	740.75	806.8	6.0847E9	8.7657E8
0.00168	1.0190E10	1.4553E9	8459	372.32	2.3334E7	5367.3	3.2506E5	2.0520E6	742.39	807.93	6.1167E9	8.7724E8
0.001685	1.0205E10	1.4557E9	8485.5	372.67	2.3349E7	5376.9	3.2612E5	2.0528E6	744.02	809.05	6.1486E9	8.7794E8
0.00169	1.0219E10	1.4561E9	8512	373.03	2.3365E7	5481.5	3.2720E5	2.0536E6	745.66	810.15	6.1809E9	8.7866E8
0.001695	1.0234E10	1.4564E9	8539.3	373.39	2.3380E7	5402.1	3.2818E5	2.0544E6	747.29	811.29	6.2141E9	8.7932E8
0.0017	1.0248E10	1.4569E9	8569.1	373.75	2.3396E7	5366.1	3.2939E5	2.0552E6	748.92	812.39	6.2488E9	8.8036E8
0.001705	1.0263E10	1.4573E9	8596.4	374.11	2.3411E7	5400	3.3050E5	2.0560E6	750.55	813.51	6.2836E9	8.8110E8
0.00171	1.0278E10	1.4576E9	8622.2	374.46	2.3427E7	5453.7	3.3155E5	2.0568E6	752.19	814.62	6.3163E9	8.8173E8
0.001715	1.0293E10	1.4580E9	8649.3	374.82	2.3442E7	5325.2	3.3265E5	2.0576E6	753.82	815.74	6.3485E9	8.8245E8
0.00172	1.0309E10	1.4585E9	8678.5	375.18	2.3457E7	5356.6	3.3383E5	2.0584E6	755.45	816.86	6.3816E9	8.8336E8
0.001725	1.0325E10	1.4589E9	8705.9	375.54	2.3472E7	5351.6	3.3500E5	2.0592E6	757.08	817.98	6.4155E9	8.8417E8
0.00173	1.0340E10	1.4592E9	8731.9	375.9	2.3487E7	5455.6	3.3615E5	2.0600E6	758.71	819.07	6.4517E9	8.8490E8
0.001735	1.0356E10	1.4597E9	8761.5	376.26	2.3502E7	5421.8	3.3739E5	2.0608E6	760.34	820.19	6.4917E9	8.8590E8
0.00174	1.0370E10	1.4600E9	8786.9	376.62	2.3517E7	5436.9	3.3854E5	2.0617E6	761.97	821.31	6.5307E9	8.8652E8
0.001745	1.0384E10	1.4604E9	8813.8	376.98	2.3532E7	5441.3	3.3965E5	2.0625E6	763.61	822.44	6.5683E9	8.8731E8
0.00175	1.0398E10	1.4608E9	8843.5	377.33	2.3547E7	5455.1	3.4104E5	2.0633E6	765.24	823.56	6.6070E9	8.8833E8
0.001755	1.0412E10	1.4612E9	8870.9	377.69	2.3562E7	5405.8	3.4222E5	2.0642E6	766.87	824.69	6.6486E9	8.8908E8
0.00176	1.0425E10	1.4615E9	8896.4	378.05	2.3577E7	5378.6	3.4339E5	2.0650E6	768.5	825.83	6.6904E9	8.8977E8
0.001765	1.0438E10	1.4619E9	8923.2	378.41	2.3592E7	5454.4	3.4453E5	2.0658E6	770.13	826.96	6.7327E9	8.9051E8
0.00177	1.0449E10	1.4623E9	8952.7	378.77	2.3607E7	5259	3.4584E5	2.0667E6	771.76	828.1	6.7797E9	8.9151E8
0.001775	1.0461E10	1.4627E9	8978.3	379.13	2.3622E7	5471	3.4704E5	2.0675E6	773.39	829.22	6.8268E9	8.9226E8
0.00178	1.0473E10	1.4631E9	9007.3	379.49	2.3637E7	5333	3.4835E5	2.0684E6	775.02	830.36	6.8778E9	8.9328E8
0.001785	1.0493E10	1.4634E9	9032.9	379.85	2.3652E7	5528.2	3.4951E5	2.0693E6	776.65	831.49	6.9281E9	8.9399E8
0.00179	1.0516E10	1.4638E9	9059.8	380.21	2.3666E7	5307.5	3.5071E5	2.0701E6	778.27	832.64	6.9799E9	8.9478E8
0.001795	1.0529E10	1.4642E9	9089.5	380.58	2.3682E7	5496.5	3.5211E5	2.0710E6	779.9	833.75	7.0389E9	8.9594E8
0.0018	1.0547E10	1.4646E9	9116.8	380.94	2.3696E7	5473.2	3.5336E5	2.0719E6	781.53	834.91	7.0974E9	8.9678E8
0.001805	1.0564E10	1.4649E9	9142.2	381.3	2.3711E7	5473.2	3.5456E5	2.0727E6	783.16	836.05	7.1552E9	8.9747E8
0.00181	1.0579E10	1.4653E9	9169.1	381.66	2.3726E7	5368.4	3.5583E5	2.0736E6	784.79	837.21	7.2106E9	8.9832E8
0.001815	1.0592E10	1.4657E9	9198.6	382.02	2.3741E7	5391.2	3.5721E5	2.0745E6	786.42	838.37	7.2626E9	8.9940E8
0.00182	1.0606E10	1.4661E9	9225.8	382.38	2.3756E7	5394.7	3.5858E5	2.0754E6	788.05	839.49	7.3127E9	9.0031E8
0.001825	1.0621E10	1.4664E9	9253	382.74	2.3770E7	5389.3	3.5992E5	2.0763E6	789.68	840.64	7.3577E9	9.0120E8
0.00183	1.0637E10	1.4668E9	9280.4	383.11	2.3785E7	5408.8	3.6129E5	2.0772E6	791.31	841.8	7.3979E9	9.0211E8
0.001835	1.0651E10	1.4672E9	9307.7	383.47	2.3800E7	5428.4	3.6265E5	2.0781E6	792.93	842.96	7.4368E9	9.0302E8
0.00184	1.0665E10	1.4675E9	9334.7	383.83	2.3814E7	5507	3.6406E5	2.0790E6	794.56	844.11	7.4722E9	9.0395E8
0.001845	1.0679E10	1.4679E9	9361.7	384.19	2.3829E7	5471.2	3.6541E5	2.0798E6	796.19	845.27	7.5058E9	9.0483E8
0.00185	1.0695E10	1.4683E9	9389.3	384.55	2.3844E7	5555.6	3.6682E5	2.0807E6	797.82	846.43	7.5357E9	9.0579E8
0.001855	1.0710E10	1.4686E9	9416.4	384.92	2.3858E7	5520	3.6816E5	2.0816E6	799.45	847.6	7.5601E9	9.0668E8
0.00186	1.0726E10	1.4690E9	9443.7	385.28	2.3872E7	5514.1	3.6954E5	2.0825E6	801.07	848.77	7.5835E9	9.0760E8
0.001865	1.0741E10	1.4693E9	9469.3	385.64	2.3887E7	5565.3	3.7090E5	2.0834E6	802.7	849.93	7.6084E9	9.0842E8
0.00187	1.0757E10	1.4697E9	9498.1	386	2.3901E7	5527.8	3.7233E5	2.0844E6	804.32	851.1	7.6363E9	9.0950E8
0.001875	1.0772E10	1.4701E9	9525.3	386.37	2.3916E7	5540.6	3.7376E5	2.0853E6	805.94	852.26	7.6652E9	9.1047E8
0.00188	1.0788E10	1.4704E9	9550.8	386.73	2.3930E7	5563.1	3.7512E5	2.0862E6	807.55	853.43	7.6939E9	9.1130E8
0.001885	1.0803E10	1.4707E9	9577.4	387.09	2.3945E7	5564.5	3.7652E5	2.0871E6	809.16	854.59	7.7223E9	9.1224E8
0.00189	1.0817E10	1.4711E9	9604.3	387.46	2.3959E7	5590.5	3.7796E5	2.0880E6	810.76	855.75	7.7509E9	9.1319E8
0.001895	1.0874E10	1.4714E9	9631.2	387.82	2.3974E7	5582.6	3.7941E5	2.0889E6	812.34	856.92	7.7802E9	9.1418E8
0.0019	1.0928E10	1.4718E9	9658	388.18	2.3989E7	5616	3.8088E5	2.0899E6	813.92	858.09	7.8083E9	9.1518E8
0.001905	1.0973E10	1.4721E9	9684.6	388.55	2.4003E7	5592.9	3.8234E5	2.0908E6	815.47	859.27	7.8305E9	9.1617E8
0.00191	1.1008E10	1.4725E9	9710.9	388.91	2.4018E7	5650.7	3.8384E5	2.0917E6	817.01	860.44	7.8481E9	9.1718E8
0.001915	1.1030E10	1.4728E9	9737	389.27	2.4032E7	5602.6	3.8535E5	2.0926E6	818.51	861.64	7.8625E9	9.1818E8
0.00192	1.1037E10	1.4732E9	9765	389.64	2.4047E7	5650.2	3.8700E5	2.0936E6	819.97	862.83	7.8749E9	9.1935E8
0.001925	1.1056E10	1.4735E9	9788.6	390	2.4062E7	5636.1	3.8846E5	2.0945E6	821.41	864.03	7.8898E9	9.2024E8
0.00193	1.1081E10	1.4739E9	9815.5	390.37	2.4076E7	5667	3.9004E5	2.0955E6	822.79	865.24	7.9072E9	9.2142E8
0.001935	1.1105E10	1.4742E9	9838.5	390.73	2.4090E7	5675.5	3.9156E5	2.0964E6	824.15	866.44	7.9243E9	9.2226E8
0.00194	1.1162E10	1.4745E9	9862.9	391.09	2.4104E7	5702.1	3.9312E5	2.0974E6	825.46	867.65	7.9414E9	9.2327E8
0.001945	1.1217E10	1.4749E9	9887.5	391.46	2.4119E7	5694.5	3.9470E5	2.0984E6	826.73	868.87	7.9571E9	9.2429E8
0.00195	1.1276E10	1.4752E9	9914.3	391.82	2.4133E7	5697.8	3.9639E5	2.0994E6	827.95	870.09	7.9702E9	9.2544E8
0.001955	1.1342E10	1.4756E9	9939.2	392.19	2.4147E7	5711.6	3.9803E5	2.1004E6	829.14	871.31	7.9838E9	9.2651E8
0.00196	1.1408E10	1.4759E9	9962.3	392.55	2.4162E7	5720.5	3.9961E5	2.1014E6	830.3	872.53	7.9977E9	9.2746E8
0.001965	1.1482E10	1.4762E9	9988.7	392.92	2.4176E7	5750.6	4.0131E5	2.1024E6	831.42	873.76	8.0107E9	9.2867E8
0.00197	1.1546E10	1.4766E9	10012	393.28	2.4190E7	5758.1	4.0293E5	2.1034E6	832.52	874.99	8.0229E9	9.2961E8
0.001975	1.1594E10	1.4769E9	10036	393.65	2.4205E7	5779.3	4.0460E5	2.1044E6	833.59	876.23	8.0345E9	9.3065E8
0.00198	1.1628E10	1.4773E9	10063	394.01	2.4220E7	5795.6	4.0635E5	2.1054E6	834.62	877.47	8.0453E9	9.3190E8
0.001985	1.1672E10	1.4776E9	10087	394.38	2.4234E7	5793.2	4.0800E5	2.1064E6	835.64	878.72	8.0569E9	9.3300E8
0.00199	1.1717E10	1.4779E9	10111	394.74	2.4249E7	5812.2	4.0963E5	2.1074E6	836.62	879.97	8.0689E9	9.3407E8
0.001995	1.1763E10	1.4783E9	10135	395.11	2.4264E7	5829.8	4.1127E5	2.1084E6	837.59	881.22	8.0812E9	9.3518E8
0.002	1.1795E10	1.4786E9	10159	395.47	2.4279E7	5842.2	4.1290E5	2.1095E6	838.53	882.48	8.0930E9	9.3629E8
0.002005	1.1723E10	1.4764E9	10180	395.84	2.4260E7	5847.2	4.1343E5	2.0685E6	839.43	883.72	8.0364E9	9.3653E8
0.00201	1.1630E10	1.4729E9	10187	396.2	2.4217E7	5852.3	4.1269E5	2.0279E6	840.29	884.91	7.9735E9	9.3570E8
0.002015	1.1523E10	1.4700E9	10193	396.56	2.4169E7	5841.3	4.1326E5	1.9876E6	841.11	886.1	7.9104E9	9.3611E8
0.00202	1.1407E10	1.4654E9	10186	396.92	2.4106E7	5841.7	4.1213E5	1.9477E6	841.9	887.23	7.8411E9	9.3485E8
0.002025	1.1288E10	1.4578E9	10160	397.27	2.4013E7	5887.5	4.0917E5	1.9083E6	842.67	888.27	7.7693E9	9.3071E8
0.00203	1.1168E10	1.4568E9	10170	397.62	2.3961E7	5861.3	4.1146E5	1.8690E6	843.39	889.36	7.6999E9	9.3400E8
0.002035	1.1043E10	1.4515E9	10153	397.97	2.3887E7	5853.9	4.1008E5	1.8302E6	844.08	890.39	7.6224E9	9.3255E8
0.00204	1.0916E10	1.4485E9	10149	398.32	2.3819E7	5818.3	4.1004E5	1.7918E6	844.74	891.39	7.5472E9	9.3386E8
0.002045	1.0789E10	1.4401E9	10112	398.67	2.3710E7	5816.6	4.0727E5	1.7538E6	845.38	892.33	7.4681E9	9.2961E8
0.00205	1.0659E10	1.4341E9	10088	399.01	2.3603E7	5826	4.0567E5	1.7162E6	846	893.22	7.3882E9	9.2797E8
0.002055	1.0527E10	1.4269E9	10057	399.34	2.3491E7	5832	4.0350E5	1.6789E6	846.59	894.04	7.3062E9	9.2525E8
0.00206	1.0394E10	1.4198E9	10027	399.68	2.3378E7	5839.9	4.0145E5	1.6421E6	847.16	894.81	7.2237E9	9.2284E8
0.002065	1.0257E10	1.4126E9	9995.4	400	2.3263E7	5838.9	3.9936E5	1.6056E6	847.71	895.52	7.1409E9	9.2043E8
0.00207	1.0119E10	1.4052E9	9962.2	400.33	2.3145E7	5845.2	3.9716E5	1.5695E6	848.24	896.17	7.0571E9	9.1785E8
0.002075	9.9944E9	1.4008E9	9951.1	400.65	2.3046E7	5795.7	3.9866E5	1.5337E6	848.74	896.87	6.9775E9	9.1967E8
0.00208	9.8629E9	1.3933E9	9917.6	400.97	2.2928E7	5783.6	3.9675E5	1.4984E6	849.22	897.51	6.8947E9	9.1722E8
0.002085	9.7333E9	1.3861E9	9888.1	401.29	2.2802E7	5766.3	3.9495E5	1.4635E6	849.68	898.11	6.8101E9	9.1539E8
0.00209	9.6090E9	1.3775E9	9847.8	401.61	2.2665E7	5761.9	3.9225E5	1.4290E6	850.12	898.64	6.7225E9	9.1184E8
0.002095	9.5240E9	1.3701E9	9817.1	401.92	2.2531E7	5741.5	3.9105E5	1.3949E6	850.55	899.14	6.6251E9	9.1013E8
0.0021	9.4380E9	1.3619E9	9781.3	402.22	2.2393E7	5725.8	3.8892E5	1.3611E6	850.96	899.6	6.5201E9	9.0741E8
0.002105	9.3502E9	1.3525E9	9735.9	402.52	2.2245E7	5721	3.8579E5	1.3278E6	851.35	899.98	6.4118E9	9.0321E8
0.00211	9.2618E9	1.3452E9	9709.1	402.82	2.2107E7	5694.1	3.8473E5	1.2948E6	851.73	900.35	6.2954E9	9.0205E8
0.002115	9.1690E9	1.3366E9	9671	403.12	2.1963E7	5674.8	3.8225E5	1.2623E6	852.09	900.66	6.1753E9	8.9898E8
0.00212	9.0716E9	1.3264E9	9620.1	403.41	2.1806E7	5668.7	3.7865E5	1.2301E6	852.44	900.9	6.0557E9	8.9400E8
0.002125	8.9624E9	1.3191E9	9596.3	403.7	2.1663E7	5638.3	3.7777E5	1.1983E6	852.77	901.13	5.9406E9	8.9325E8
0.00213	8.8464E9	1.3100E9	9557.2	403.98	2.1514E7	5617.2	3.7511E5	1.1670E6	853.1	901.31	5.8259E9	8.9000E8
0.002135	8.7505E9	1.2992E9	9502.2	404.26	2.1348E7	5608.6	3.7113E5	1.1360E6	853.41	901.42	5.7125E9	8.8448E8
0.00214	8.6727E9	1.2917E9	9479.9	404.53	2.1200E7	5576.2	3.7018E5	1.1055E6	853.7	901.51	5.6161E9	8.8380E8
0.002145	8.5771E9	1.2823E9	9440.6	404.8	2.1046E7	5549.8	3.6751E5	1.0753E6	853.98	901.56	5.5118E9	8.8047E8
0.00215	8.4787E9	1.2713E9	9385.3	405.07	2.0877E7	5534.7	3.6353E5	1.0456E6	854.26	901.54	5.4070E9	8.7492E8
0.002155	8.3784E9	1.2632E9	9360.9	405.33	2.0723E7	5502.4	3.6223E5	1.0163E6	854.52	901.51	5.3168E9	8.7375E8
0.00216	8.2752E9	1.2534E9	9319.8	405.59	2.0563E7	5476.6	3.5932E5	9.8739E5	854.76	901.42	5.2126E9	8.7007E8
0.002165	8.1675E9	1.2436E9	9280.1	405.84	2.0399E7	5449.1	3.5674E5	9.5890E5	855	901.3	5.1137E9	8.6666E8
0.00217	8.0564E9	1.2336E9	9238.5	406.09	2.0232E7	5421.9	3.5383E5	9.3080E5	855.23	901.14	5.0142E9	8.6290E8
0.002175	7.9463E9	1.2231E9	9191.5	406.34	2.0062E7	5397.9	3.5042E5	9.0311E5	855.44	900.91	4.9192E9	8.5841E8
0.00218	7.8363E9	1.2135E9	9156.4	406.58	1.9896E7	5366.6	3.4830E5	8.7582E5	855.65	900.67	4.8317E9	8.5560E8
0.002185	7.7184E9	1.2032E9	9114.6	406.82	1.9727E7	5335.8	3.4537E5	8.4895E5	855.84	900.38	4.7362E9	8.5175E8
0.00219	7.5979E9	1.1929E9	9072.9	407.05	1.9557E7	5303.7	3.4248E5	8.2249E5	856.03	900.05	4.6447E9	8.4795E8
0.002195	7.4764E9	1.1825E9	9030.3	407.28	1.9385E7	5272.5	3.3947E5	7.9643E5	856.21	899.69	4.5552E9	8.4399E8
0.0022	7.3519E9	1.1720E9	8987.7	407.51	1.9212E7	5240.5	3.3648E5	7.7079E5	856.37	899.28	4.4680E9	8.4004E8
0.002205	7.2215E9	1.1614E9	8944.8	407.73	1.9039E7	5209	3.3348E5	7.4556E5	856.53	898.84	4.3833E9	8.3603E8
0.00221	7.0900E9	1.1508E9	8902.9	407.95	1.8865E7	5177	3.3049E5	7.2083E5	856.68	898.38	4.3176E9	8.3209E8
0.002215	6.9589E9	1.1398E9	8857.5	408.16	1.8690E7	5146.5	3.2695E5	6.9656E5	856.82	897.91	4.2587E9	8.2755E8
0.00222	6.8275E9	1.1283E9	8806.8	408.38	1.8512E7	5116.7	3.2292E5	6.7276E5	856.95	897.4	4.2065E9	8.2232E8
0.002225	6.6827E9	1.1184E9	8778.8	408.58	1.8343E7	5085.2	3.2103E5	6.4959E5	857.08	896.92	4.2107E9	8.2014E8
0.00223	6.5736E9	1.1074E9	8738.5	408.79	1.8172E7	5053.7	3.1766E5	6.2679E5	857.19	896.42	4.1858E9	8.1603E8
0.002235	6.5632E9	1.0965E9	8699.4	408.99	1.7999E7	5021	3.1447E5	6.0445E5	857.3	895.92	4.1725E9	8.1208E8
0.00224	6.5556E9	1.0854E9	8660.4	409.19	1.7825E7	4988.7	3.1118E5	5.8254E5	857.4	895.41	4.1631E9	8.0802E8
0.002245	6.5367E9	1.0743E9	8621.5	409.38	1.7651E7	4956.1	3.0783E5	5.6107E5	857.5	894.88	4.1568E9	8.0391E8
0.00225	6.5178E9	1.0632E9	8583	409.57	1.7478E7	4923.9	3.0456E5	5.4001E5	857.59	894.32	4.1518E9	7.9980E8
0.002255	6.4696E9	1.0520E9	8544.1	409.76	1.7305E7	4889.6	3.0144E5	5.1931E5	857.67	893.74	4.1318E9	7.9563E8
0.00226	6.3797E9	1.0408E9	8503.1	409.94	1.7131E7	4854.1	2.9854E5	4.9879E5	857.74	893.16	4.0719E9	7.9134E8
0.002265	6.2574E9	1.0295E9	8460	410.12	1.6957E7	4818.1	2.9578E5	4.7850E5	857.81	892.56	3.9886E9	7.8697E8
0.00227	6.1110E9	1.0181E9	8414.6	410.29	1.6782E7	4781.6	2.9310E5	4.5846E5	857.87	891.92	3.8884E9	7.8250E8
0.002275	5.9442E9	1.0067E9	8367	410.46	1.6606E7	4743.9	2.9046E5	4.3871E5	857.92	891.25	3.7759E9	7.7792E8
0.00228	5.7634E9	9.9521E8	8317.5	410.63	1.6430E7	4704.2	2.8776E5	4.1928E5	857.97	890.54	3.6730E9	7.7321E8
0.002285	5.5646E9	9.8363E8	8266.6	410.79	1.6253E7	4663.1	2.8492E5	4.0027E5	858.01	889.8	3.5684E9	7.6839E8
0.00229	5.3499E9	9.7198E8	8214.4	410.95	1.6075E7	4621.8	2.8186E5	3.8168E5	858.05	889.02	3.4667E9	7.6345E8
0.002295	5.1375E9	9.6028E8	8161.7	411.1	1.5898E7	4579.2	2.7872E5	3.6354E5	858.08	888.21	3.3771E9	7.5845E8
0.0023	4.9341E9	9.4851E8	8108.2	411.25	1.5720E7	4535.9	2.7534E5	3.4587E5	858.11	887.38	3.2947E9	7.5335E8
0.002305	4.7457E9	9.3669E8	8054.5	411.4	1.5543E7	4492.8	2.7181E5	3.2869E5	858.13	886.54	3.2206E9	7.4820E8
0.00231	4.5764E9	9.2481E8	8000.7	411.54	1.5366E7	4449.5	2.6822E5	3.1203E5	858.14	885.68	3.1573E9	7.4301E8
0.002315	4.4343E9	9.1291E8	7947.4	411.68	1.5190E7	4405.7	2.6469E5	2.9584E5	858.15	884.83	3.1040E9	7.3787E8
0.00232	4.3113E9	9.0100E8	7894.2	411.82	1.5015E7	4361.5	2.6124E5	2.8012E5	858.16	883.96	3.0600E9	7.3276E8
0.002325	4.1946E9	8.8905E8	7840.8	411.96	1.4840E7	4317.5	2.5789E5	2.6484E5	858.16	883.08	3.0169E9	7.2766E8
0.00233	4.0816E9	8.7706E8	7787.1	412.09	1.4667E7	4273.7	2.5461E5	2.4999E5	858.16	882.19	2.9758E9	7.2257E8
0.002335	3.9722E9	8.6505E8	7733.5	412.22	1.4495E7	4230.1	2.5140E5	2.3558E5	858.15	881.29	2.9348E9	7.1751E8
0.00234	3.8700E9	8.5300E8	7679.4	412.34	1.4324E7	4187.7	2.4832E5	2.2161E5	858.14	880.37	2.8940E9	7.1245E8
0.002345	3.7612E9	8.4093E8	7625.1	412.47	1.4154E7	4145.9	2.4541E5	2.0806E5	858.12	879.44	2.8491E9	7.0740E8
0.00235	3.6557E9	8.2883E8	7570.5	412.58	1.3985E7	4105	2.4263E5	1.9495E5	858.1	878.51	2.8049E9	7.0238E8
0.002355	3.5716E9	8.1669E8	7515.5	412.7	1.3817E7	4064.7	2.3996E5	1.8226E5	858.08	877.55	2.7627E9	6.9742E8
0.00236	3.5065E9	8.0454E8	7460.3	412.81	1.3650E7	4025.9	2.3734E5	1.7000E5	858.05	876.59	2.7330E9	6.9251E8
0.002365	3.4467E9	7.9238E8	7404.6	412.93	1.3483E7	3987.6	2.3485E5	1.5817E5	858.02	875.61	2.7074E9	6.8767E8
0.00237	3.3921E9	7.8019E8	7348.5	413.03	1.3318E7	3949.8	2.3236E5	1.4677E5	857.99	874.61	2.6832E9	6.8284E8
0.002375	3.3387E9	7.6797E8	7292	413.14	1.3153E7	3912.6	2.2994E5	1.3578E5	857.95	873.61	2.6605E9	6.7801E8
0.00238	3.2855E9	7.5575E8	7235.1	413.24	1.2988E7	3875.2	2.2764E5	1.2522E5	857.91	872.59	2.6378E9	6.7316E8
0.002385	3.2324E9	7.4351E8	7177.8	413.34	1.2823E7	3838.3	2.2541E5	1.1509E5	857.87	871.56	2.6156E9	6.6827E8
0.00239	3.2091E9	7.3126E8	7119.9	413.43	1.2660E7	3801.8	2.2322E5	1.0537E5	857.82	870.52	2.5924E9	6.6337E8
0.002395	3.1845E9	7.1900E8	7061.7	413.53	1.2497E7	3766.3	2.2098E5	96083	857.77	869.47	2.5694E9	6.5842E8
0.0024	3.1564E9	7.0672E8	7003	413.62	1.2336E7	3731.5	2.1865E5	87216	857.72	868.41	2.5464E9	6.5343E8
0.002405	3.1254E9	6.9444E8	6943.9	413.71	1.2175E7	3697.4	2.1624E5	78773	857.67	867.35	2.5292E9	6.4841E8
0.00241	3.0939E9	6.8215E8	6884.3	413.79	1.2014E7	3663.1	2.1376E5	70756	857.61	866.27	2.5120E9	6.4339E8
0.002415	3.0619E9	6.6986E8	6824.3	413.88	1.1855E7	3628.8	2.1117E5	63166	857.55	865.19	2.4958E9	6.3833E8
0.00242	3.0282E9	6.5757E8	6763.9	413.96	1.1697E7	3594.6	2.0846E5	56002	857.49	864.09	2.4812E9	6.3323E8
0.002425	2.9929E9	6.4528E8	6703	414.03	1.1541E7	3561.1	2.0573E5	49264	857.43	862.99	2.4664E9	6.2813E8
0.00243	2.9574E9	6.3300E8	6641.7	414.11	1.1385E7	3528.1	2.0295E5	42954	857.36	861.89	2.4520E9	6.2301E8
0.002435	2.9214E9	6.2073E8	6580	414.18	1.1231E7	3495.5	2.0011E5	37074	857.3	860.78	2.4359E9	6.1789E8
0.00244	2.8849E9	6.0848E8	6517.8	414.26	1.1078E7	3462.7	1.9726E5	31623	857.23	859.67	2.4190E9	6.1277E8
0.002445	2.8477E9	5.9624E8	6455.1	414.32	1.0926E7	3430.8	1.9440E5	26602	857.16	858.55	2.4015E9	6.0768E8
0.00245	2.8094E9	5.8403E8	6392	414.39	1.0775E7	3399.4	1.9152E5	22011	857.09	857.42	2.3828E9	6.0260E8
0.002455	2.7710E9	5.7185E8	6328.5	414.46	1.0626E7	3369.1	1.8867E5	17852	857.02	856.29	2.3654E9	5.9755E8
0.00246	2.7333E9	5.5972E8	6264.5	414.52	1.0478E7	3340	1.8585E5	14124	856.95	855.14	2.3468E9	5.9253E8
0.002465	2.6956E9	5.4762E8	6200.1	414.58	1.0332E7	3311	1.8306E5	10829	856.88	853.99	2.3306E9	5.8755E8
0.00247	2.6579E9	5.3558E8	6135.2	414.64	1.0187E7	3282.5	1.8033E5	7968.1	856.8	852.83	2.3144E9	5.8262E8
0.002475	2.6206E9	5.2362E8	6069.9	414.7	1.0043E7	3254.5	1.7766E5	5542.3	856.73	851.67	2.2985E9	5.7772E8
0.00248	2.5807E9	5.1173E8	6004.1	414.75	9.9011E6	3227	1.7504E5	3553.2	856.66	850.5	2.2895E9	5.7288E8
0.002485	2.5354E9	4.9993E8	5938	414.8	9.7606E6	3200.9	1.7248E5	2002.4	856.58	849.32	2.2831E9	5.6813E8
0.00249	2.4893E9	4.8827E8	5871.3	414.86	9.6217E6	3174.6	1.6992E5	891.61	856.51	848.14	2.2769E9	5.6346E8
0.002495	2.4444E9	4.7676E8	5804.1	414.91	9.4844E6	3150.3	1.6734E5	223.32	856.43	846.95	2.2707E9	5.5888E8
0.0025	2.4000E9	4.6548E8	5736.6	414.95	9.3488E6	3127.5	1.6474E5	0.0014577	856.36	845.75	2.2652E9	5.5437E8
